# Supplementary material for: A 3D-Printed Millifluidic Platform Enabling Bacterial Preconcentration and DNA Purification for Molecular Detection of Pathogens in Blood
Source: PubMed Central journal article supplement (PMC6187281; doi:10.3390/mi9090472), 2018-09-17
Supplement: micromachines-09-00472-s001.pdf [file micromachines-09-00472-s001.pdf]

# 3D-printed millifluidic platform enabling bacterial preconcentration and DNA purification for molecular detection of pathogens in blood

**Yonghee Kim<sup>1+</sup>, Jinyeop Lee<sup>1+</sup> and Sungsu Park<sup>1,\*</sup>**

<sup>1</sup> School of Mechanical Engineering, Sungkyunkwan University, Suwon, 16419, Republic of Korea;  
nanopark@skku.edu

\* Correspondence: nanopark@skku.edu; Tel.: +82-31-290-7431

Received: date; Accepted: date; Published: date

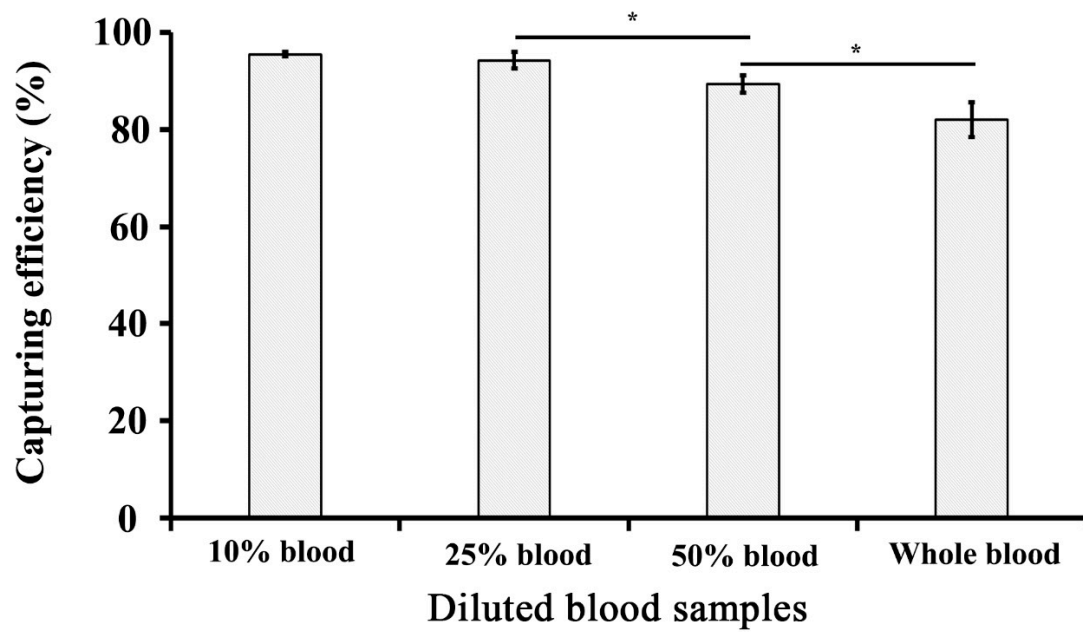

Figure S1. Effect of dilution of blood on bacterial capturing efficiency. 10 mL of either diluted blood (10%, 25%, 50%) or whole blood samples containing  $10^5$  CFU/mL of *E. coli* O157:H7 (final conc.) and Ab-MNPs ( $10^{13}$  particles/mL, final conc.) were injected into the 3DpmFD at a flow rate of 2 mL/min. \*:  $p < 0.05$ , Student *t*-test. Sample number = 3.
